# Supplementary material for: Use of Dialectical Behavior Therapy in Inpatient Treatment of Borderline Personality Disorder: A Systematic Review
Source: Atypon-hosted journal article supplement (doi:10.1176/appi.ps.201100311), 2012-06-29
Supplement: pss6309_0881_ds.pdf [file pss6309_0881_ds.pdf]

Table 2. Published Studies Examining Application of Inpatient DBT (alphabetical listing)

| Citation | Inpatient Setting                                                | DBT Sample                                                                                                  | Comparison Sample                                                                                                                                      | DBT Modification/<br>Intervention                                                                                                                                                                                                                                                                                                                                                                                                                                                                                                                                                                                                                                                                                                                          | Outcome Measures                                                                                                                                | Results                                                                                                                                                                                                   | Effect Size |
|----------|------------------------------------------------------------------|-------------------------------------------------------------------------------------------------------------|--------------------------------------------------------------------------------------------------------------------------------------------------------|------------------------------------------------------------------------------------------------------------------------------------------------------------------------------------------------------------------------------------------------------------------------------------------------------------------------------------------------------------------------------------------------------------------------------------------------------------------------------------------------------------------------------------------------------------------------------------------------------------------------------------------------------------------------------------------------------------------------------------------------------------|-------------------------------------------------------------------------------------------------------------------------------------------------|-----------------------------------------------------------------------------------------------------------------------------------------------------------------------------------------------------------|-------------|
| 36       | Hospital unit for personality disorders<br><br>Ashville, NC, USA | 130 patients discharged from the hospital unit<br><br>(79% women, Median age = 30, Age range = 16-57 years) | Patients in a General Adult Psychiatry Unit receiving treatment as usual (not DBT). Not assessed more specifically.<br><br>(Demographics not reported) | <p><u>Treatment Duration:</u> 3 months</p> <p><u>Individual Therapy:</u> Frequency not reported; administered by psychodynamically trained therapists adhering to Linehan's (1993) treatment hierarchy</p> <p><u>Group Skills Training:</u> 90 minutes per week; focused on attentional training, emotion regulation, distress tolerance/ reality acceptance, and interpersonal effectiveness</p> <p><u>Consultation:</u> Therapists available during morning rounds</p> <p><u>Therapist Consultation Group Included;</u> frequency not reported</p> <p><u>Additional Components:</u></p> <p><i>Homework groups:</i> Led by nurses to review assignments from skills training.</p> <p><i>Other therapeutic groups and activities:</i> To address other</p> | Monthly rates of parasuicidal behaviors based on incident reports from the units for the months before, during, and after the transition to DBT | <p>Mean monthly rates of parasuicide decreased for the DBT group after the introduction of DBT</p> <p>No change in mean monthly rates of parasuicide for the comparison group during this time period</p> | Not given   |

|    |                                                                                                      |                                                                                 |                                                                                                                                                                                                                                                                                                                                                                                  |                                                                                                                                                                                                                                                                                                                                                                                                                                                                                                                                                                                                                                                                          |                                                                                                                                                                                      |                                                                                                                                                                                                                                                                                                                                                                                                                                                                                                                               |                                                                                                                                                                                                                                                                                                                                                                                                                                                                                                                                                                                                                                                                                                                                                                                                                                                                                                          |
|----|------------------------------------------------------------------------------------------------------|---------------------------------------------------------------------------------|----------------------------------------------------------------------------------------------------------------------------------------------------------------------------------------------------------------------------------------------------------------------------------------------------------------------------------------------------------------------------------|--------------------------------------------------------------------------------------------------------------------------------------------------------------------------------------------------------------------------------------------------------------------------------------------------------------------------------------------------------------------------------------------------------------------------------------------------------------------------------------------------------------------------------------------------------------------------------------------------------------------------------------------------------------------------|--------------------------------------------------------------------------------------------------------------------------------------------------------------------------------------|-------------------------------------------------------------------------------------------------------------------------------------------------------------------------------------------------------------------------------------------------------------------------------------------------------------------------------------------------------------------------------------------------------------------------------------------------------------------------------------------------------------------------------|----------------------------------------------------------------------------------------------------------------------------------------------------------------------------------------------------------------------------------------------------------------------------------------------------------------------------------------------------------------------------------------------------------------------------------------------------------------------------------------------------------------------------------------------------------------------------------------------------------------------------------------------------------------------------------------------------------------------------------------------------------------------------------------------------------------------------------------------------------------------------------------------------------|
|    |                                                                                                      |                                                                                 |                                                                                                                                                                                                                                                                                                                                                                                  | aspects of individual/<br>community functioning                                                                                                                                                                                                                                                                                                                                                                                                                                                                                                                                                                                                                          |                                                                                                                                                                                      |                                                                                                                                                                                                                                                                                                                                                                                                                                                                                                                               |                                                                                                                                                                                                                                                                                                                                                                                                                                                                                                                                                                                                                                                                                                                                                                                                                                                                                                          |
| 13 | University<br>hospital unit for<br>borderline<br>personality<br>disorder<br><br>Freiburg,<br>Germany | 31 women<br><br>( <i>Mean</i> age =<br>29.1 years,<br><i>Range</i> = 18-<br>44) | 19 female<br>(waitlisted)<br>treatment as<br>usual controls<br>at admission<br>(19 women at<br>follow-up).<br>TAU =<br>professional<br>mental health<br>care in the<br>community<br>[some inpatient<br>care ( <i>n</i> =12) &<br>outpatient care<br>( <i>n</i> = 14)]. Not<br>reported more<br>specifically.<br><br>( <i>Mean</i> age =<br>29.5 years,<br><i>Range</i> = 19-38). | <u>Treatment Duration</u> : 3<br>months<br><br><u>Individual Therapy</u> : 2<br>hours per week;<br>followed standard DBT<br>protocol<br><br><u>Group Skills Training</u> :<br>2 hours per week;<br>followed standard DBT<br>manual<br><br><u>Consultation</u> : Available<br>through milieu support<br><br><u>Therapist Consultation<br/>Group</u> : 2 hours per<br>week<br><br><u>Additional<br/>Components</u> :<br><br><i>Group<br/>psychoeducation</i> : 1<br>hour per week<br><br><i>Peer group meetings</i> : 2<br>hours per week<br><br><i>Mindfulness group</i> : 1<br>hour per week<br><br><i>Individual body-<br/>oriented therapy</i> : 1.5<br>hours per week | BDI<br><br>DES<br><br>GAF<br><br>HAMA<br><br>HAMD<br><br>IIP<br><br>LPC<br><br>SCL-90-R<br><br>STAI<br><br>STAXI<br><br>Assessed at<br>pretreatment and 1<br>month post<br>discharge | DBT group<br>showed<br>significant<br>improvement<br>on all<br>outcomes<br>except anger 1-<br>month post<br>treatment<br>(finding was<br>maintained<br>when non-<br>completers<br>were included<br>in analysis).<br><br>TAU group<br>showed no<br>significant<br>change on any<br>measure 1-<br>month post<br>treatment<br><br>Fewer DBT<br>patients<br>engaged in<br>self-harm<br>behavior at 1-<br>month post<br>treatment than<br>TAU group.<br><br>DBT patients<br>improved<br>significantly<br>more than<br>TAU group on | Effect sizes ( <i>d</i> ) for pre-<br>post ranged from from<br>.12 (STAXI) to 1.21<br>(GAF) in the DBT group<br>and from .00 (IIP) to .15<br>(STAI) in the<br>comparison group<br><br>For DBT groups:<br>DES, <i>d</i> = .53<br>GAF, <i>d</i> = 1.21<br>HAMA, <i>d</i> = .52<br>STAI, <i>d</i> = 1.02<br>BDI, <i>d</i> = .90<br>IIP, <i>d</i> = .60<br>STAXI, <i>d</i> = .12<br>SCL-90-R, <i>d</i> = .84<br><br>Effect sizes ( <i>f</i> <sup>2</sup> ) for<br>amount of variance due<br>to group membership<br>varied between .07 (IIP)<br>and .26 (BDI)<br><br>BDI, <i>f</i> <sup>2</sup> = .26<br>DES, <i>f</i> <sup>2</sup> = .04<br>GAF, <i>f</i> <sup>2</sup> = .12<br>HAMA, <i>f</i> <sup>2</sup> = .09<br>HAMD, <i>f</i> <sup>2</sup> = .13<br>IIP, <i>f</i> <sup>2</sup> = .07<br>SCL-GSI, <i>f</i> <sup>2</sup> = .15<br>STAI, <i>f</i> <sup>2</sup> = .25<br>STAXI, <i>f</i> <sup>2</sup> = -- |

|    |                                                    |                                                                  |      |                                                                                                                                                                                                                                                                                                                                                                                                                                                                                                 |                                                                                                                                                       |                                                                                                                                                                                                                    |                                                                                                                                                                                                                                                                                                                                                                                                                                                                                                                                                                                             |
|----|----------------------------------------------------|------------------------------------------------------------------|------|-------------------------------------------------------------------------------------------------------------------------------------------------------------------------------------------------------------------------------------------------------------------------------------------------------------------------------------------------------------------------------------------------------------------------------------------------------------------------------------------------|-------------------------------------------------------------------------------------------------------------------------------------------------------|--------------------------------------------------------------------------------------------------------------------------------------------------------------------------------------------------------------------|---------------------------------------------------------------------------------------------------------------------------------------------------------------------------------------------------------------------------------------------------------------------------------------------------------------------------------------------------------------------------------------------------------------------------------------------------------------------------------------------------------------------------------------------------------------------------------------------|
|    |                                                    |                                                                  |      |                                                                                                                                                                                                                                                                                                                                                                                                                                                                                                 |                                                                                                                                                       | depression, global functioning, anxiety, and interpersonal problems<br><br>13 patients in DBT group met criteria for clinically relevant improvement. No patients in the TAU group met these criteria.             |                                                                                                                                                                                                                                                                                                                                                                                                                                                                                                                                                                                             |
| 32 | Psychiatric hospital Unit<br><br>Freiburg, Germany | 24 women<br><br>(Mean age = 28.3 years, Range = 17.4-44.4 years) | None | <u>Treatment Duration:</u> 3 months<br><br>Specific components of treatments not reported<br><br><u>Treatment delivered in 3 phases:</u><br><br><i>Phase 1:</i> Analysis of target behaviors (beginning with behavior that got them hospitalized) and develop a treatment target<br><br><i>Phase 2:</i> Theoretical training of patients, acquisition of specific skills, contingency management<br><br><i>Phase 3:</i> Discharge planning and establishment of contact with the therapist that | BDI<br><br>DES<br><br>HAMA<br><br>HAMD<br><br>LPC<br><br>SCL-90-R<br><br>STAI<br><br>STAXI<br><br>Assessed at pretreatment and 1 month post discharge | Significant post treatment reductions in dissociation, depression, anxiety, frequency of self-injury and several symptoms on the SCL-90-R (e.g., somatization, depression, aggression, psychoticism, total stress) | Mean effect size (ES) of therapy with regard to reduction in symptoms ranges from .69 (STAI) to 1.4 (Compulsiveness)<br><br>Dissociation, ES = 1.04<br>BDI, ES = 1.30<br>STAI, ES = .69<br>Somatization, ES = 1.14<br>Compulsive, ES = 1.4<br>Soc Insec, ES = .97<br>Depression, ES = .91<br>Anxiety, ES = 1.08<br>Aggression, ES = .72<br>PhobicThought, ES=1.03<br>Paranoia, ES = .82 Tot<br>Psychoticism, ES = 1.02<br>Total Stress, ES = 1.08<br>Intensity, ES = 1.13<br>Symptoms, ES = 1.01<br><br>Fq Self Injury, ES = .25<br>STAXI, ES = .10<br>HAMA-Tot, ES = .15<br>HAMD, ES = .17 |

|    |                                                                     |                                                                                                                                                                                                                                                    |                                                                                                                                                                                                                                     |                                                                                                                                                                                                                                                                                                                                                                                                                                                                                                           |                                                                                                                                                                                                                                  |                                                                                                                                                                                                                                                                           |                                                                                                                                                                                     |
|----|---------------------------------------------------------------------|----------------------------------------------------------------------------------------------------------------------------------------------------------------------------------------------------------------------------------------------------|-------------------------------------------------------------------------------------------------------------------------------------------------------------------------------------------------------------------------------------|-----------------------------------------------------------------------------------------------------------------------------------------------------------------------------------------------------------------------------------------------------------------------------------------------------------------------------------------------------------------------------------------------------------------------------------------------------------------------------------------------------------|----------------------------------------------------------------------------------------------------------------------------------------------------------------------------------------------------------------------------------|---------------------------------------------------------------------------------------------------------------------------------------------------------------------------------------------------------------------------------------------------------------------------|-------------------------------------------------------------------------------------------------------------------------------------------------------------------------------------|
|    |                                                                     |                                                                                                                                                                                                                                                    |                                                                                                                                                                                                                                     | will continue treatment.                                                                                                                                                                                                                                                                                                                                                                                                                                                                                  |                                                                                                                                                                                                                                  |                                                                                                                                                                                                                                                                           |                                                                                                                                                                                     |
| 33 | General child and adolescent unit<br><br>Manitoba, Winnipeg, Canada | 32 adolescents at admission<br><br>26 adolescents at follow up<br><br>(Total sample at admission (n = 62) <i>Mean</i> age = 15.4, <i>Range</i> = 14-17, 52 girls)<br><br>No demographic differences between DBT and Comparison groups at admission | 30 adolescents at admission<br><br>27 adolescents at follow up<br><br>TAU = Daily psychodynamic group, weekly individual psychodynamic therapy provided by psychiatrist, and psychodynamic milieu. Medication management as needed. | <u>Treatment Duration:</u> 2 weeks<br><br><u>Individual Therapy:</u> 2 times per week; reviewed diary cards and conducted behavioral and solution analyses<br><br><u>Group Skills Training:</u> 45-75 minute sessions daily; adapted DBT curriculum for daily use<br><br><u>Consultation:</u> Available on DBT milieu<br><br><u>Therapist Consultation Group:</u> For DBT therapists and nurses; frequency not reported<br><br><u>Additional Components:</u><br><br><i>Ancillary treatment:</i> As needed | BDI (13)<br><br>LPC<br><br>SIQ<br><br>Adherence to follow up recommendations<br><br>Behavioral incidents on unit<br><br>ER visits<br><br>Hospitalizations<br><br>Assessed at pre-treatment, discharge, and 1 year post discharge | DBT group demonstrated a greater reduction in behavioral incidents during admission than TAU group<br><br>Significant reductions in parasuicidal behavior, depressive symptoms, and suicidal ideation at 1 year for both groups; no significant between group differences | BDI-13<br>DBT, ES = 1.67<br>TAU, ES = 1.05<br><br>SIQ<br>DBT, ES = 2.12<br>TAU, ES = 1.36<br><br>KHS<br>DBT, ES = .73<br>TAU, ES = .33<br><br>LPC<br>DBT, ES = .63<br>TAU, ES = .73 |
| 42 | Psychiatric hospital unit<br><br>Manitoba, Winnipeg, Canada         | Case study:<br>One girl<br><br>(Age = 16)                                                                                                                                                                                                          | None                                                                                                                                                                                                                                | <u>Treatment Duration:</u><br>Not reported<br><br><u>Individual Therapy:</u> 2 times per week; reviewed diary cards and conducted behavioral and solution analyses<br><br><u>Group Skills Training:</u><br>45-75 minute sessions daily; adapted DBT curriculum for daily use                                                                                                                                                                                                                              | BDI (13)<br><br>Parasuicide Count<br><br>RSIQ-J<br><br>Assessed at pre-treatment, and 1 year post discharge                                                                                                                      | 13-item BDI score dropped from 28 at admission to 5 at 1-year follow-up<br><br>Suicidal Ideation dropped from 82 at admission to 17 at 1-year follow-up.                                                                                                                  | Not given                                                                                                                                                                           |

|    |                           |                       |      |                                                                                                                                                                                                                         |                                                                                      |                                                                                                                                                                                                                                                                                       |                                                                                                                                                                                                                                                                                                                                                                                                                                                                                                                                                                                                                                                                                                       |
|----|---------------------------|-----------------------|------|-------------------------------------------------------------------------------------------------------------------------------------------------------------------------------------------------------------------------|--------------------------------------------------------------------------------------|---------------------------------------------------------------------------------------------------------------------------------------------------------------------------------------------------------------------------------------------------------------------------------------|-------------------------------------------------------------------------------------------------------------------------------------------------------------------------------------------------------------------------------------------------------------------------------------------------------------------------------------------------------------------------------------------------------------------------------------------------------------------------------------------------------------------------------------------------------------------------------------------------------------------------------------------------------------------------------------------------------|
|    |                           |                       |      | <p><u>Consultation</u>: available from nurse</p> <p><u>Therapist Consultation Group</u>: biweekly for DBT therapists</p> <p><u>Additional Components</u>:</p> <p><i>Family meetings</i> at admission and discharge.</p> |                                                                                      | <p>Parasuicide count dropped from 143 in the year prior to admission to 113 in the year following discharge.</p> <p>No re-hospitalizations in the year post-discharge.</p> <p>(Statistical significance not reported)</p>                                                             |                                                                                                                                                                                                                                                                                                                                                                                                                                                                                                                                                                                                                                                                                                       |
| 39 | Long-term follow-up to 13 | 31 completers from 13 | None | See: Bohus et al. 2004                                                                                                                                                                                                  | <p>See: Bohus, et al. 2004</p> <p>Assessed at 1, 8, and 20 months post-discharge</p> | <p>Improvements in Global Severity Index were maintained throughout follow-up period.</p> <p>At 1 month follow up 45% of completers showed clinically significant improvement and were characterized as functional. 47% of completers were characterized as functional at 8 month</p> | <p>T1:<br/>GSI, <math>d = 1.0</math><br/>BDI, <math>d = 0.9</math><br/>GAF, <math>d = 0.59</math><br/>STAI, <math>d = 0.85</math><br/>IIP, <math>d = 0.6</math><br/>DES, <math>d = 0.95</math><br/>HAMA, <math>d = 0.65</math><br/>HAMD, <math>d = 0.6</math><br/>STAXI, <math>d = \underline{0.15}</math></p> <p>T2:<br/>GSI, <math>d = 1.0</math><br/>BDI, <math>d = 1.0</math><br/>GAF, <math>d = 0.59</math><br/>STAI, <math>d = 0.65</math><br/>IIP, <math>d = 0.35</math><br/>DES, <math>d = 0.79</math><br/>HAMA, <math>d = 0.45</math><br/>HAMD, <math>d = 0.7</math><br/>STAXI, <math>d = \underline{0.35}</math></p> <p>T3:<br/>GSI, <math>d = 1.7</math><br/>BDI, <math>d = 1.3</math></p> |

|  |  |  |  |  |                                                                                                                                                                                                                                                                                                                                                                                                                                                                                                                                        |                                                                                                                                                                                                                                              |
|--|--|--|--|--|----------------------------------------------------------------------------------------------------------------------------------------------------------------------------------------------------------------------------------------------------------------------------------------------------------------------------------------------------------------------------------------------------------------------------------------------------------------------------------------------------------------------------------------|----------------------------------------------------------------------------------------------------------------------------------------------------------------------------------------------------------------------------------------------|
|  |  |  |  |  | <p>follow-up and 50% of completers were characterized as functional at 20 month follow-up.</p> <p>Low levels of psychopathology and symptoms improvement at 1-month follow-up were maintained at the 8 and 20 month follow-up points.</p> <p>Rates of self-injury for the 4 weeks preceding each measurement points differed (74% before admission, 35% before 1 month point, 57% before 8 month point, and 23% before 20 month point)</p> <p>Significant reductions in suicide attempts were also maintained across the follow-up</p> | <p>GAF, <math>d = 0.7</math><br/> STAI, <math>d = 0.95</math><br/> IIP, <math>d = 0.7</math><br/> DES, <math>d = 0.9</math><br/> HAMA, <math>d = 0.8</math><br/> HAMD, <math>d = 0.9</math><br/> STAXI, <math>d = \underline{0.3}</math></p> |
|--|--|--|--|--|----------------------------------------------------------------------------------------------------------------------------------------------------------------------------------------------------------------------------------------------------------------------------------------------------------------------------------------------------------------------------------------------------------------------------------------------------------------------------------------------------------------------------------------|----------------------------------------------------------------------------------------------------------------------------------------------------------------------------------------------------------------------------------------------|

|    |                                                                            |                                                                                                                            |                                                                                                                                         |                                                                                                                                                                                                                                                                                                                                                                                                                                                                                                                                                          |                                                                                                                                                     |                                                                                                                                                                                                                                                                           |                                                                                                                                                                                                               |
|----|----------------------------------------------------------------------------|----------------------------------------------------------------------------------------------------------------------------|-----------------------------------------------------------------------------------------------------------------------------------------|----------------------------------------------------------------------------------------------------------------------------------------------------------------------------------------------------------------------------------------------------------------------------------------------------------------------------------------------------------------------------------------------------------------------------------------------------------------------------------------------------------------------------------------------------------|-----------------------------------------------------------------------------------------------------------------------------------------------------|---------------------------------------------------------------------------------------------------------------------------------------------------------------------------------------------------------------------------------------------------------------------------|---------------------------------------------------------------------------------------------------------------------------------------------------------------------------------------------------------------|
|    |                                                                            |                                                                                                                            |                                                                                                                                         |                                                                                                                                                                                                                                                                                                                                                                                                                                                                                                                                                          |                                                                                                                                                     | period.                                                                                                                                                                                                                                                                   |                                                                                                                                                                                                               |
| 37 | <p>University hospital general psychiatric unit</p> <p>Lubeck, Germany</p> | <p>50 patients at admission</p> <p>37 patients at follow-up</p> <p>(Mean age = 30.5 years, 88% female)</p>                 | None                                                                                                                                    | <p><u>Treatment Duration:</u> 3 months</p> <p><u>Individual Therapy:</u> 1 hour per week; followed standard DBT protocol</p> <p><u>Group Skills Training:</u> 3 100-minute sessions per week; followed standard DBT manual, but added self-management module</p> <p><u>Consultation:</u> Not included</p> <p><u>Therapist Consultation Group:</u> Not included</p> <p><u>Additional Components:</u></p> <p><i>Outpatient therapy:</i> 29 out of 37 patients received non-DBT outpatient therapy after discharge during the 15-month follow-up period</p> | <p>BDI</p> <p>GAF</p> <p>SCID</p> <p>SCID-for Personality Disorders</p> <p>Assessed at pre-treatment, discharge, and at fifteen month follow-up</p> | <p>A significant reduction in comorbid Axis I disorders was found at follow-up.</p> <p>A significant increase in comorbid personality disorders was observed at follow-up.</p> <p>Significant improvements in depression and global functioning observed at follow-up</p> | <p>GSI</p> <p>Pre-Post, ES = .68</p> <p>Pre-follow up, ES = .44</p> <p>BDI</p> <p>Pre-Post, ES = .59</p> <p>Pre-follow up, ES = .60</p> <p>GAF</p> <p>Pre-Post, ES = 1.33</p> <p>Pre-follow up, ES = 1.85</p> |
| 34 | <p>Long-term adolescent psychiatric unit</p> <p>Tacoma, WA, USA</p>        | <p>106 adolescent from time period of years 2000-2005</p> <p>(Mean age = 15.45 years, Range = 12-17 years, 58% female)</p> | <p>104 adolescents, historical controls from hospital database (years 1995-1999)</p> <p>Received family and individual therapies as</p> | <p><u>Developmental Modifications</u> of DBT based on symptom severity, determined by clinical judgment.</p> <p><u>3 Intensity Levels:</u></p> <p><i>Milieu Only:</i> Milieu DBT</p> <p><i>Group DBT:</i> Milieu</p>                                                                                                                                                                                                                                                                                                                                     | <p>Length of hospitalization (months)</p> <p>Discharge placement</p> <p>Change in medications</p> <p>CGAS</p>                                       | <p>A significant increase in global functioning from admission to discharge was found for the DBT group (not reported for the control group).</p>                                                                                                                         | Not given                                                                                                                                                                                                     |

|    |                                                           |                                                |                                                                                                       |                                                                                                                                                                                                                                                                                                                                                                                                                                                                                                                                        |                                                                                                                                                  |                                                                                                                                                                                                                                                                                                                                                                                                                                             |                                                                                                                                                                                                                                             |
|----|-----------------------------------------------------------|------------------------------------------------|-------------------------------------------------------------------------------------------------------|----------------------------------------------------------------------------------------------------------------------------------------------------------------------------------------------------------------------------------------------------------------------------------------------------------------------------------------------------------------------------------------------------------------------------------------------------------------------------------------------------------------------------------------|--------------------------------------------------------------------------------------------------------------------------------------------------|---------------------------------------------------------------------------------------------------------------------------------------------------------------------------------------------------------------------------------------------------------------------------------------------------------------------------------------------------------------------------------------------------------------------------------------------|---------------------------------------------------------------------------------------------------------------------------------------------------------------------------------------------------------------------------------------------|
|    |                                                           |                                                | <p>necessary. Not reported more specifically.</p> <p>(Mean age = 15.3 years, Range = 12-15 years)</p> | <p>and group DBT</p> <p><i>Full DBT</i>: Milieu, skills training group, and individual DBT</p> <p><u>Treatment Duration</u>: Not reported</p> <p><u>Individual Therapy</u>: Frequency not reported; followed standard DBT protocol</p> <p><u>Group Skills Training</u>: Frequency not reported; followed standard DBT manual</p> <p><u>Consultation</u>: Available on the milieu</p> <p><u>Therapist Consultation Group</u>: Regular meetings for DBT therapists; frequency not reported</p> <p><u>Additional Components</u>: None</p> | <p>Frequency of locked seclusions</p> <p>Frequency of non-suicidal self-injurious behavior (NSIB)</p> <p>Assessed at admission and discharge</p> | <p>A significant reduction in number of prescribed medications from admission to discharge was found for the DBT group (not reported for the control group).</p> <p>For the DBT group, self-injurious behavior decreased more so than for the control group, over time spent in hospital.</p> <p>DBT group with most severe history of self-injury had lower rates of self-injury over 12 months of hospitalization than control group.</p> |                                                                                                                                                                                                                                             |
| 41 | <p>Psychiatric hospital unit</p> <p>Freiburg, Germany</p> | <p>20 women</p> <p>(Mean age = 27.7 years)</p> | <p>20 female (waitlisted) treatment as usual controls</p> <p>TAU = outpatient</p>                     | <p><u>Treatment Duration</u>: 3 months</p> <p><u>Individual Therapy</u>: 1 hour per week; followed standard DBT protocol</p>                                                                                                                                                                                                                                                                                                                                                                                                           | <p>BSES</p> <p>ESES</p> <p>MSES</p> <p>SCCS</p>                                                                                                  | <p>Significant improvements in elements of self-esteem, including self concept clarity, self regard,</p>                                                                                                                                                                                                                                                                                                                                    | <p>SCC, <math>d = -2.21</math></p> <p>BSE, <math>d = -3.77</math></p> <p>ESE, <math>d = .32</math></p> <p>MSES: Global SE, <math>d = -2.61</math></p> <p>Self regard, <math>d = -2.72</math></p> <p>Soc. skills, <math>d = -2.08</math></p> |



|    |                                                                              |                                                                                                                                                                                         |                                                                                  |                                                                                                                                                                                                                                                                                                                                                                                                                                                                       |                                                                                                                                                  |                                                                                                                                                                                                                                                                                                                                        |                                                                                                                                                                                                                                                                                                                                                      |
|----|------------------------------------------------------------------------------|-----------------------------------------------------------------------------------------------------------------------------------------------------------------------------------------|----------------------------------------------------------------------------------|-----------------------------------------------------------------------------------------------------------------------------------------------------------------------------------------------------------------------------------------------------------------------------------------------------------------------------------------------------------------------------------------------------------------------------------------------------------------------|--------------------------------------------------------------------------------------------------------------------------------------------------|----------------------------------------------------------------------------------------------------------------------------------------------------------------------------------------------------------------------------------------------------------------------------------------------------------------------------------------|------------------------------------------------------------------------------------------------------------------------------------------------------------------------------------------------------------------------------------------------------------------------------------------------------------------------------------------------------|
|    |                                                                              |                                                                                                                                                                                         | <p>treatment. Not assessed more specifically.</p> <p>(Mean age = 32.5 years)</p> | <p><u>Group Skills Training:</u><br/>3 hours per week; followed the standard DBT manual</p> <p><u>Consultation:</u> Not included</p> <p><u>Therapist Consultation Group:</u> 2 hours per week</p> <p><u>Additional Components:</u></p> <p><i>Mindfulness groups:</i> 2 hours per week</p> <p><i>Group psychoeducation:</i> 1 hour per week</p> <p><i>Peer group meetings:</i> 2 hours per week</p> <p><i>Individual body oriented therapy:</i> 1.5 hours per week</p> | <p>BDI</p> <p>SCL-90-R</p> <p>SCID II</p> <p>Assessed at admission and 10 weeks into treatment</p>                                               | <p>social skills, and social confidence for DBT group observed 10 weeks into treatment. Such improvements were not observed in the control group.</p> <p>Significant improvement in global functioning and depression for DBT group observed at 10 weeks into treatment. Such improvements were not observed in the control group.</p> | <p>Soc. confid., <math>d = -2.66</math><br/>Perform. SE, <math>d = -1.87</math><br/>Phys. appear, <math>d = -1.81</math><br/>Phys. abilities, <math>d = -1.05</math></p>                                                                                                                                                                             |
| 40 | <p>University hospital general psychiatric unit</p> <p>Freiburg, Germany</p> | <p>60 women</p> <p>See 13</p> <p>Completers: participants who completed 12 week therapy program (n = 41) vs. Non-completers: participants who left of therapy before the end of the</p> | None                                                                             | See: Bohus et al. 2004                                                                                                                                                                                                                                                                                                                                                                                                                                                | <p>AAQ</p> <p>PSQ</p> <p>SCL-90-R (general psychopathology and anger-hostility)</p> <p>STAI</p> <p>Assessed at pretreatment and 1 month post</p> | <p>Higher experiential avoidance and fewer suicide attempts predicted drop-out from inpatient DBT</p>                                                                                                                                                                                                                                  | <p>Not provided in article – calculated by first author</p> <p>Effect sizes for difference between completers and non-completers on outcomes measures.</p> <p>PSQ, <math>d = .45</math><br/>AAQ, <math>d = .74</math><br/>General Psychopathology, <math>d = .14</math><br/>Anger-Hostility, <math>d = .55</math><br/>STAI, <math>d = .72</math></p> |

|    |                                                                        |                                                                                                                                            |                                                                                                                                                                                 |                                                                                                                                                                                                                                                                                                                                                                                                                                                                                                                                                      |                                                                                                                                           |                                                                                                                                                                                                                                                                                                                                                                                                                         |                                                            |
|----|------------------------------------------------------------------------|--------------------------------------------------------------------------------------------------------------------------------------------|---------------------------------------------------------------------------------------------------------------------------------------------------------------------------------|------------------------------------------------------------------------------------------------------------------------------------------------------------------------------------------------------------------------------------------------------------------------------------------------------------------------------------------------------------------------------------------------------------------------------------------------------------------------------------------------------------------------------------------------------|-------------------------------------------------------------------------------------------------------------------------------------------|-------------------------------------------------------------------------------------------------------------------------------------------------------------------------------------------------------------------------------------------------------------------------------------------------------------------------------------------------------------------------------------------------------------------------|------------------------------------------------------------|
|    |                                                                        | 11th week (n = 19)<br><br>(No demographic differences between groups)                                                                      |                                                                                                                                                                                 |                                                                                                                                                                                                                                                                                                                                                                                                                                                                                                                                                      | discharge                                                                                                                                 |                                                                                                                                                                                                                                                                                                                                                                                                                         | Suicide attempts, $d = .81$<br>Hospitalizations, $d = .08$ |
| 38 | University hospital general psychiatric unit<br><br>Ann Arbor, MI, USA | 16 inpatients participating in daily Creative Coping, a DBT skills training group<br><br>(Total sample: Mean age = 31.4 years, 68% female) | 15 inpatients participating in daily Wellness and Lifestyles, a non-therapeutic, non-DBT discussion oriented group<br><br>(Demographics not reported for each group separately) | <u>Treatment Duration:</u> Minimum 10 weekdays<br><br><u>Individual Therapy:</u> Not included<br><br><u>Group Skills Training:</u> 45 minutes per day; Creative Coping (CC): group therapy adapted from Linehan's DBT. Psychoeducational group, led/co-led by nurses; included 5 sessions on emotion regulation, 4 on interpersonal effectiveness, and 1 on distress tolerance.<br><br><u>Consultation:</u> Not included<br><br><u>Therapist Consultation Group:</u> Not included<br><br><u>Additional Components:</u> Written home work assignments | ASIQ<br>BDI<br>CCQ<br>HS<br>IELCS<br>STAXI<br><br>Frequency of acting out behavior on unit<br><br>Assessed at pre-treatment and discharge | Both groups demonstrated improvement on measures of depression, hopelessness, and suicidal ideation from pre-treatment to post-treatment<br><br>No group differences on anger expression or knowledge of coping skills<br><br>DBT subjects became more externally oriented, while control group subjects became more internally oriented<br><br>More DBT subjects engaged in acting out behavior during hospitalization | Not given                                                  |

|                                                                                                                                                                                                                                                                                                                                                                                                                                                                                                                                                                                                                                                                                                                                                                                                                                                                                                                                                                                                                                                                                                                                                                                                                                                                                                                                                                                                                                                                                                                                                                                                                                                                                                                              |  |  |  |  |  |                              |  |
|------------------------------------------------------------------------------------------------------------------------------------------------------------------------------------------------------------------------------------------------------------------------------------------------------------------------------------------------------------------------------------------------------------------------------------------------------------------------------------------------------------------------------------------------------------------------------------------------------------------------------------------------------------------------------------------------------------------------------------------------------------------------------------------------------------------------------------------------------------------------------------------------------------------------------------------------------------------------------------------------------------------------------------------------------------------------------------------------------------------------------------------------------------------------------------------------------------------------------------------------------------------------------------------------------------------------------------------------------------------------------------------------------------------------------------------------------------------------------------------------------------------------------------------------------------------------------------------------------------------------------------------------------------------------------------------------------------------------------|--|--|--|--|--|------------------------------|--|
|                                                                                                                                                                                                                                                                                                                                                                                                                                                                                                                                                                                                                                                                                                                                                                                                                                                                                                                                                                                                                                                                                                                                                                                                                                                                                                                                                                                                                                                                                                                                                                                                                                                                                                                              |  |  |  |  |  | than control group subjects. |  |
| <p><b>Measures Included in Table:</b><br/> <b>AAQ:</b> Acceptance and Action Questionnaire, <b>ASIQ:</b> Adult Suicidal Ideation Questionnaire, <b>BDHI-D:</b> Buss-Durkee Hostility Inventory, <b>BDI:</b> Beck Depression Inventory, <b>BDI (13):</b> 13 item Beck Depression Inventory, <b>BHS:</b> Beck Hopelessness Scale, <b>BSES:</b> Basic self esteem scale, <b>BSSI:</b> Beck Scale for Suicide Ideation, <b>CGAS:</b> Child-Global Assessment Scale, <b>CCQ:</b> Creative Coping Questionnaire, <b>DES:</b> Dissociative Experiences Scale, <b>ESES:</b> Earning self esteem scale, <b>GAF:</b> Global Assessment of Functioning Scale, <b>GSI: symptom severity index scale score</b>, <b>HAMA:</b> Hamilton Anxiety Scale, <b>HAMD:</b> Hamilton Depression Scale, <b>HS:</b> Hopelessness Scale, <b>IDAS:</b> Irritability, Depression and Anxiety Scale, <b>IELCS:</b> Internal-External Locus of Control Scale, <b>IIP:</b> Inventory of Interpersonal Problems, <b>IS:</b> Impulsiveness Scale, <b>LPC:</b> Lifetime Parasuicide Count, <b>MSES:</b> Multidimensional self esteem scale (self regard, social skills, social confidence, performance SE, physical appearance, physical abilities and a global SE index), <b>NAS:</b> Novaco Anger Scale, <b>PSQ:</b> Link's Perceived Stigma Questionnaire, <b>RLF:</b> Reasons for Living Scale, <b>RSIQ-J:</b> Reynold's Suicidal Ideation Questionnaire Jr., <b>SCCS:</b> Self Concept clarity scale, <b>SCID:</b> Structured Clinical Interview for DSM-IV, <b>SCL-90-R:</b> Symptom Checklist (SCL-90-R), <b>SIQ:</b> Suicidal Ideation Questionnaire, <b>STAI:</b> State-Trait Anxiety Index, <b>STAXI:</b> State-Trait Anger Expression Inventory</p> |  |  |  |  |  |                              |  |
